# Supplementary material for: Liquid-crystalline cholesterol-based [60]fullerene hexaadducts
Source: Royal Society of Chemistry journal article supplement (doi:10.1039/b509081d), 2005-11-10

Supplementary Material (ESI) for Journal of Materials Chemistry  
This journal is © The Royal Society of Chemistry 2005

## Liquid-crystalline cholesterol-based [60]fullerene hexaadducts

**Delphine Felder-Flesch,\* Leszek Rupnicki, Cyril Bourgogne, Bertrand Donnio and Daniel Guillon**

Institut de Physique et Chimie des Matériaux de Strasbourg, Groupe des Matériaux Organiques,  
23 rue du Loess, BP 43, 67034 Strasbourg Cedex 2, France

Correspondence to: [felder@ipcms.u-strasbg.fr](mailto:felder@ipcms.u-strasbg.fr)

### TABLE OF CONTENTS

- $^1\text{H}$  and  $^{13}\text{C}$  NMR ( $\text{CDCl}_3$ ) of compounds **2** and **1**
- UV-Visible spectra ( $\text{CH}_2\text{Cl}_2$ ) of **2** and **1**
- DSC curves obtained for **5**, **2** and **1**
- Polarizing optical microscope photographs of malonate **5** at : (a)  $70^\circ\text{C}$ , (b)  $80^\circ\text{C}$
- X-ray diffraction pattern obtained for **2** at  $80^\circ\text{C}$
- Evolution of the X-ray patterns of **1** and **2** with temperature
- Variation of the lamellar periodicity  $d$  with temperature for **1** and **2**
- Molecular modelling picture: short-range hexagonal lattice obtained for **1** by molecular modelling: (a) top view, (b) side view

**<sup>1</sup>H NMR (CDCl<sub>3</sub>, 300 MHz) of compound 2. (\* CH<sub>2</sub>Cl<sub>2</sub>)**

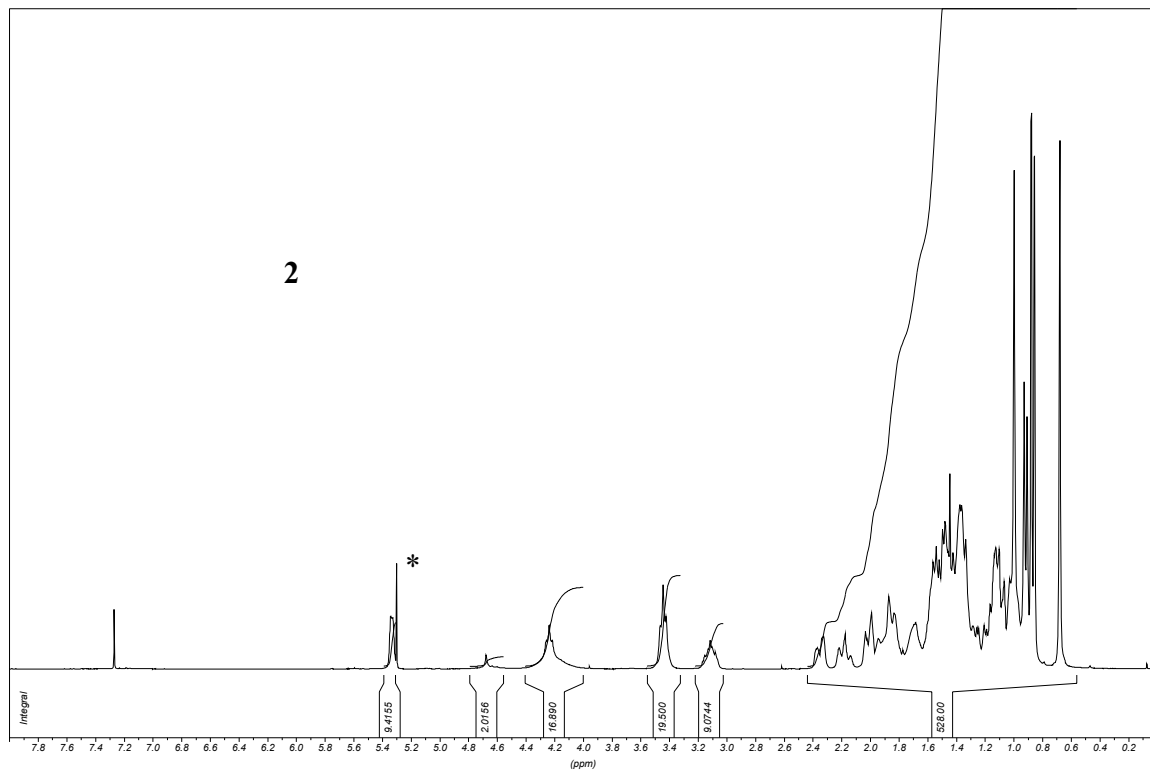

**<sup>13</sup>C NMR (CDCl<sub>3</sub>, 75 MHz) of compound 2.**

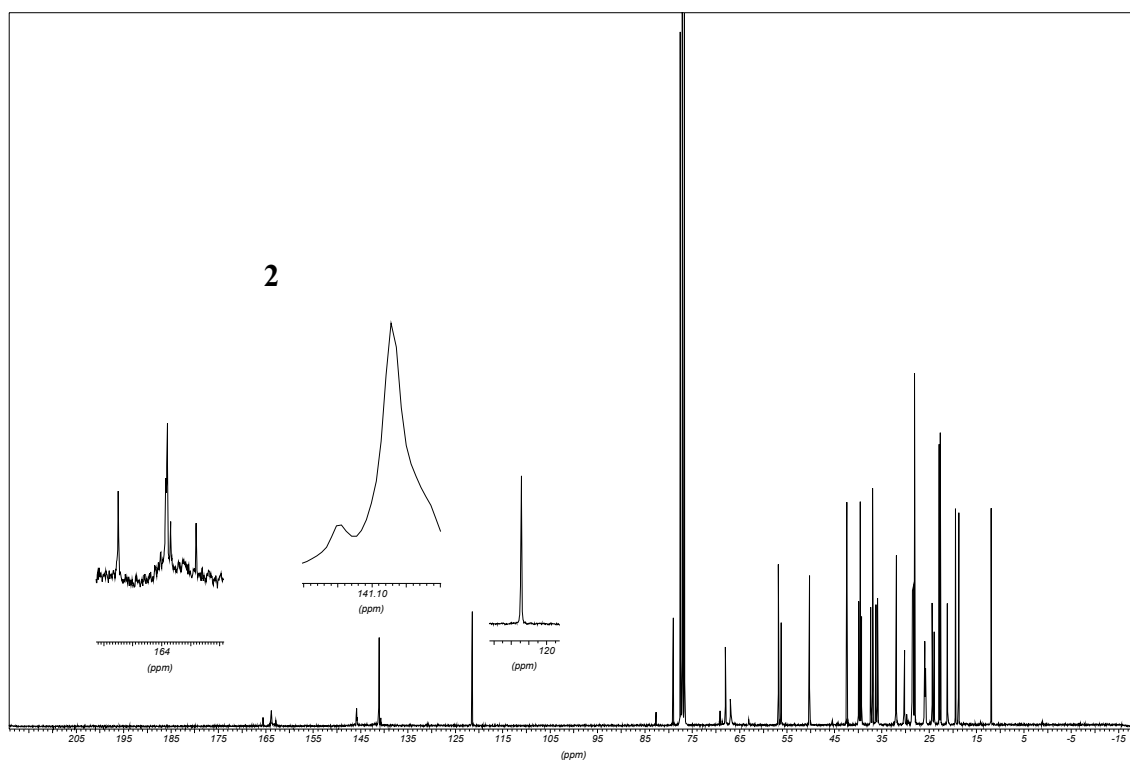

**$^1\text{H}$  NMR ( $\text{CDCl}_3$ , 300 MHz) of compound 1. (\*  $\text{CH}_2\text{Cl}_2$ )**

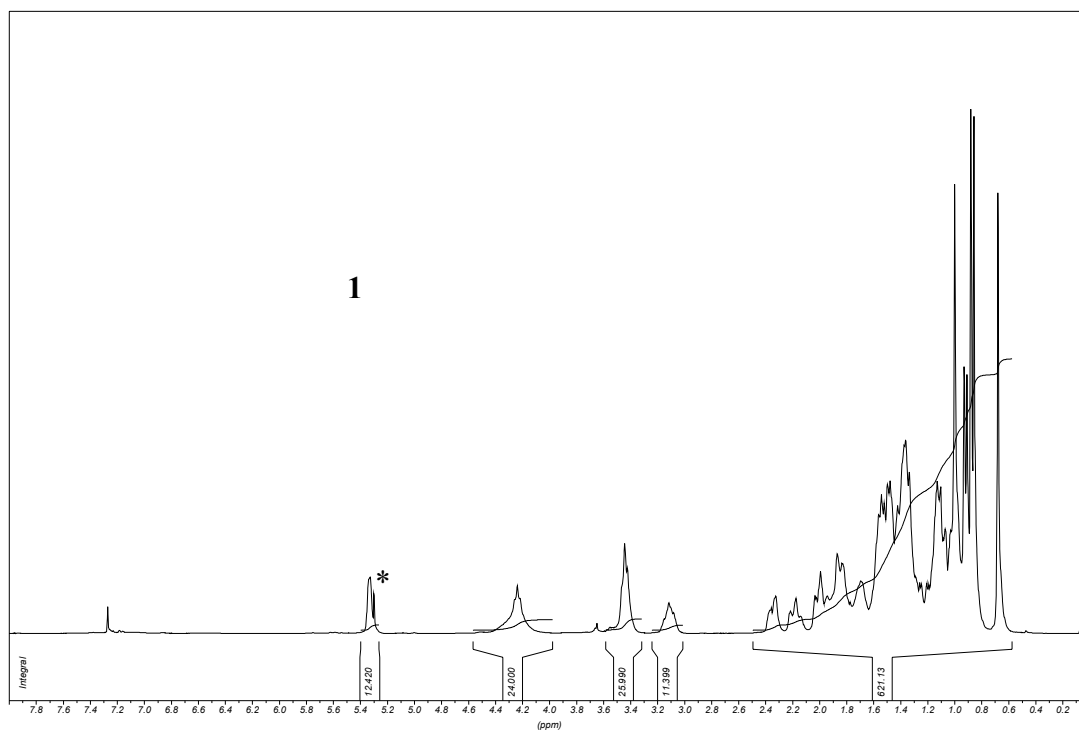

**$^{13}\text{C}$  NMR ( $\text{CDCl}_3$ , 75 MHz) of compound 1. (\* toluene)**

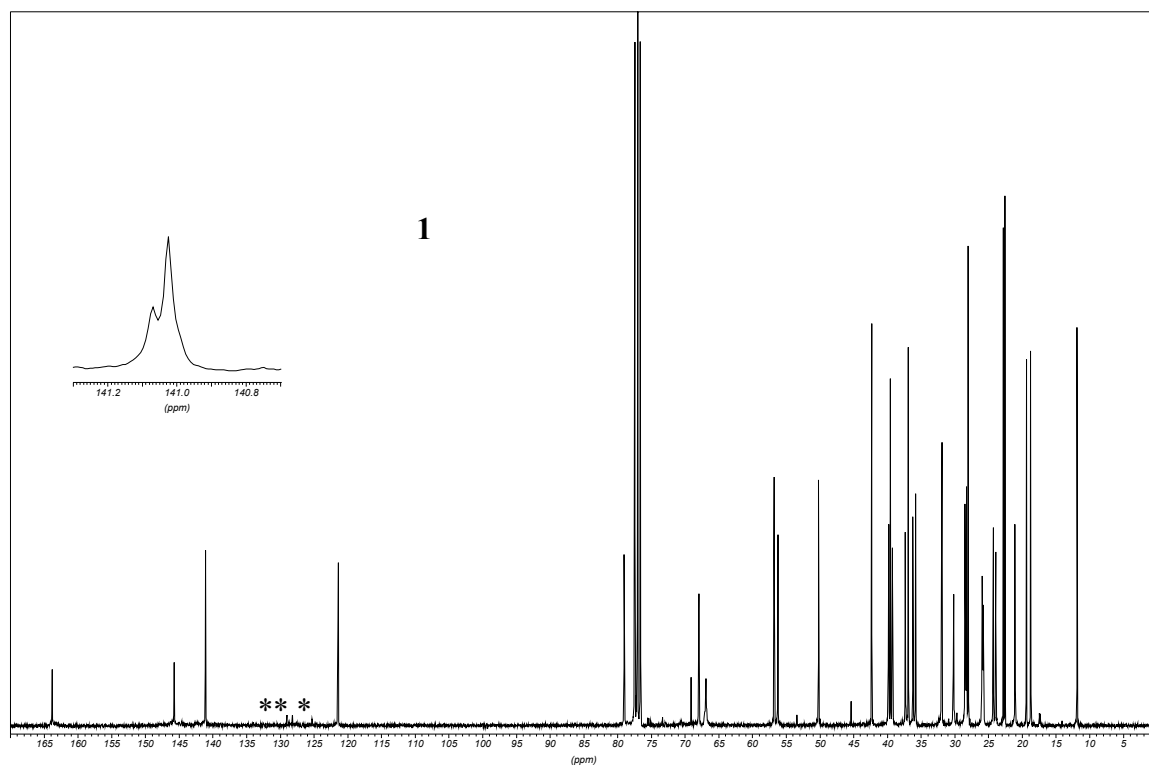

**UV-Visible spectrum ( $\text{CH}_2\text{Cl}_2$ ) of compound 2.**

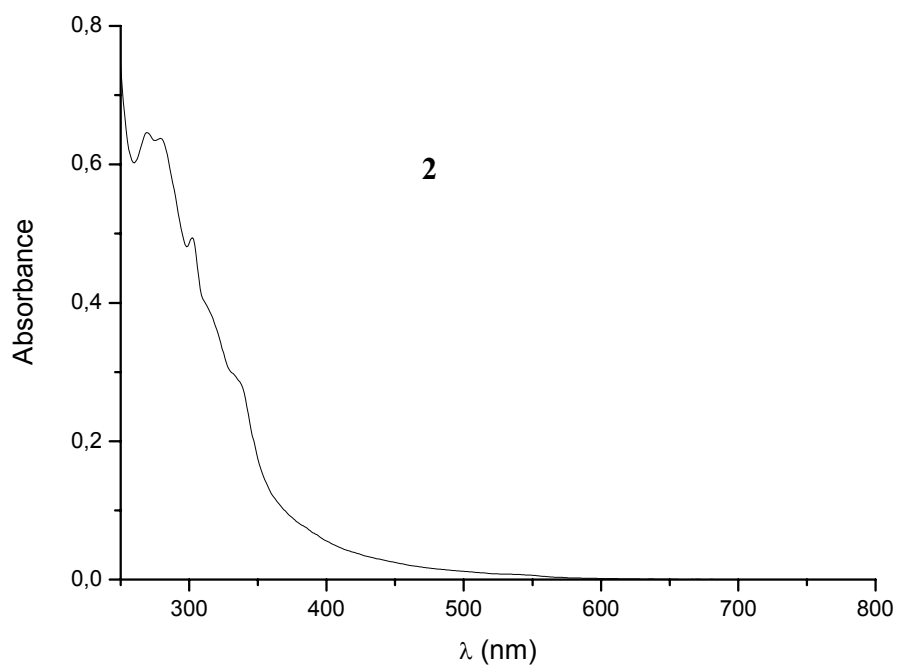

**UV-Visible spectrum ( $\text{CH}_2\text{Cl}_2$ ) of compound 1.**

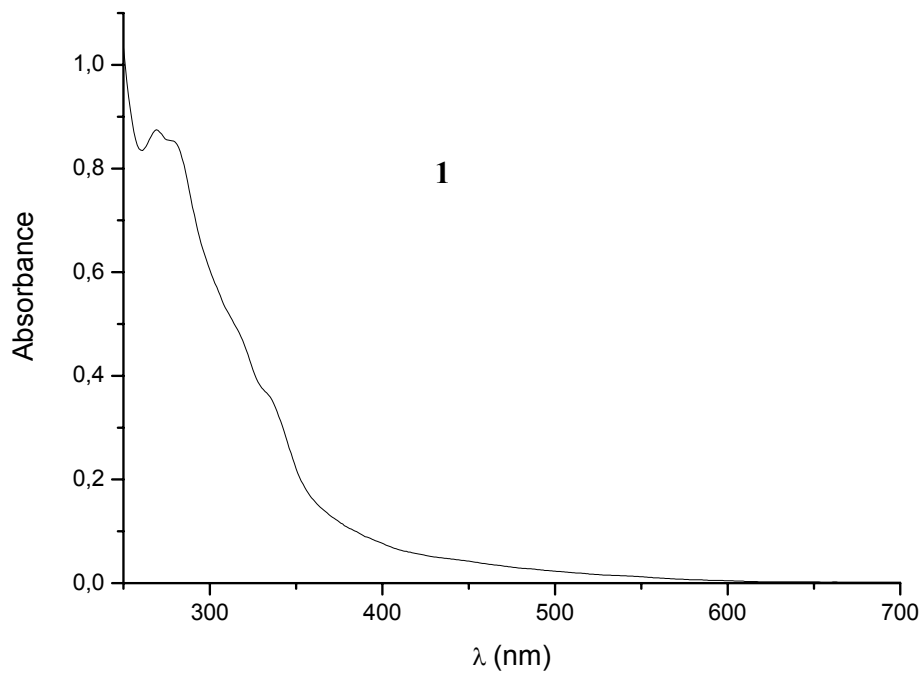

DSC curves obtained for 5 (first heating), 2 and 1 (first heating-cooling cycle).

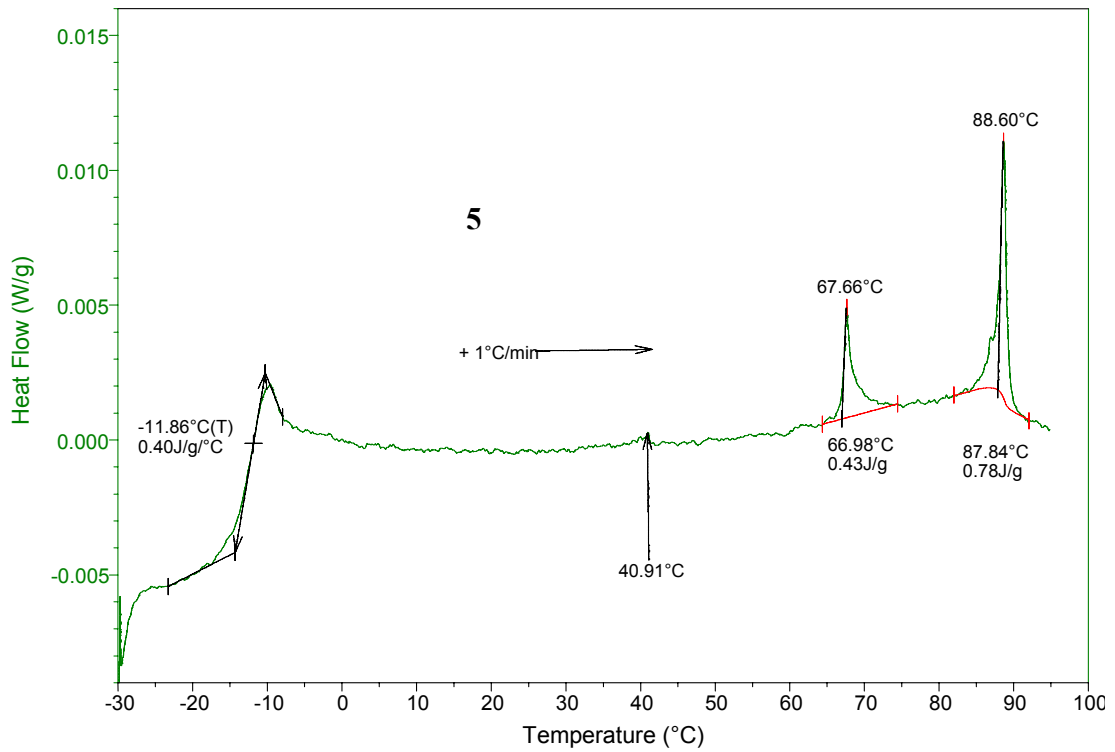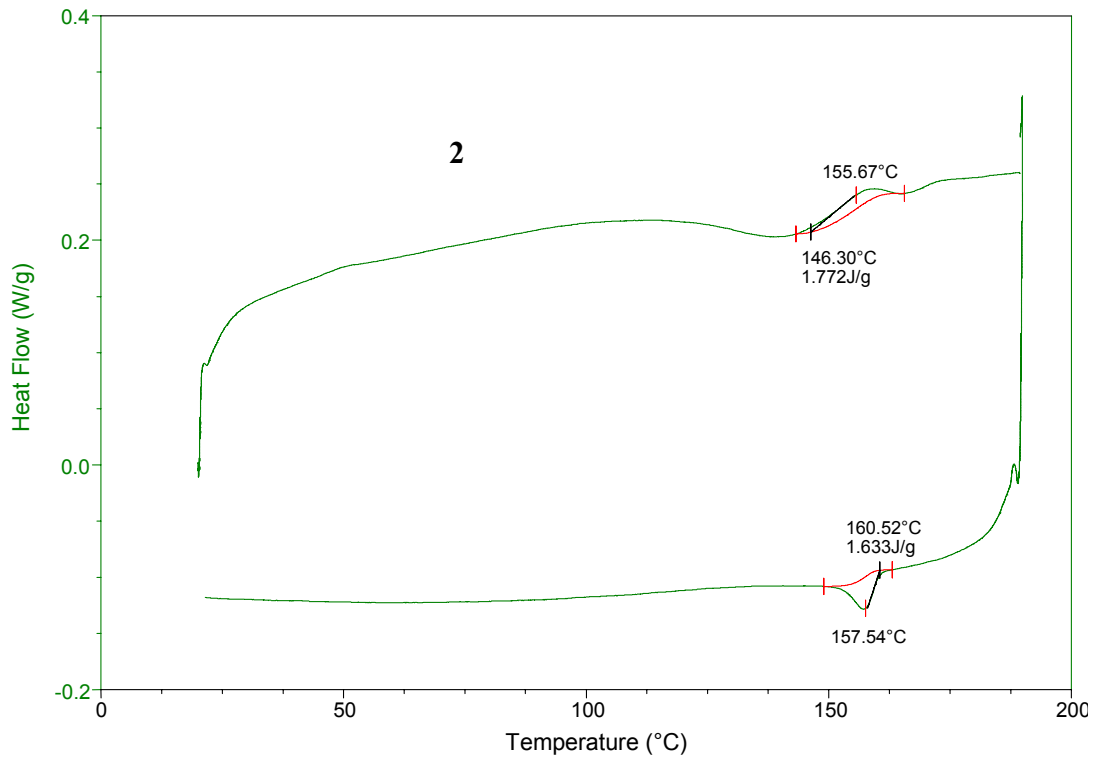

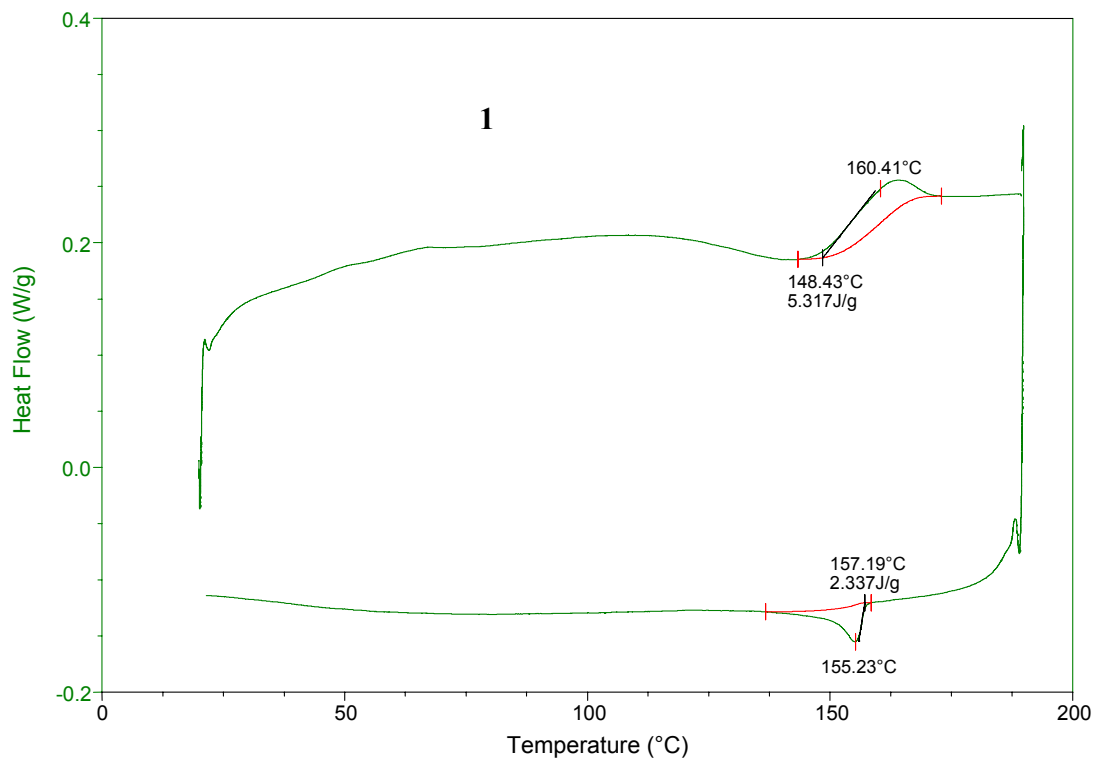

**Polarizing optical microscope photographs of malonate 5 at: (a) 70°C, (b) 80°C.**

(a)

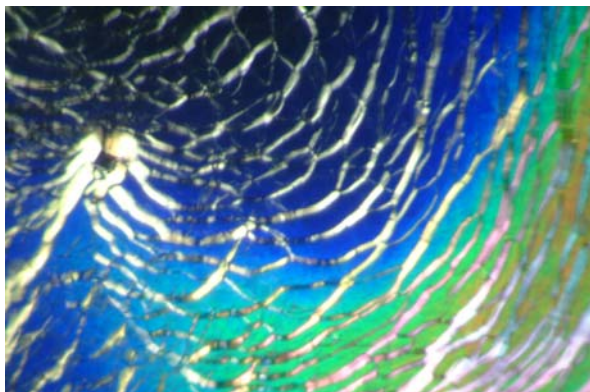

(b)

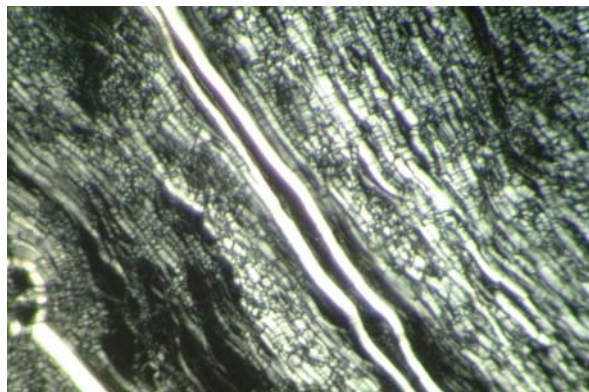

X-Ray diffraction pattern obtained for 2 at 80°C.

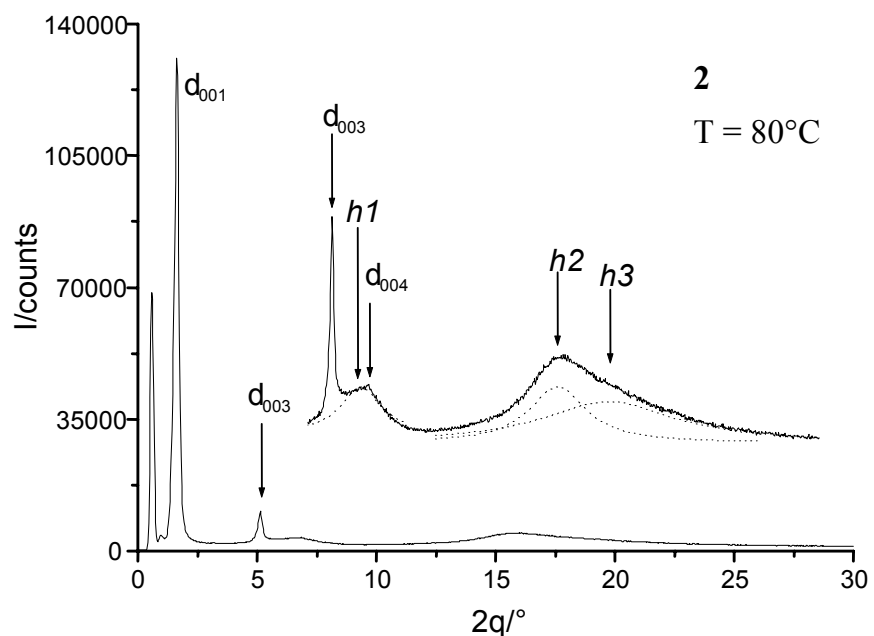

Evolution of the X-ray patterns of 1 and 2 with temperature.

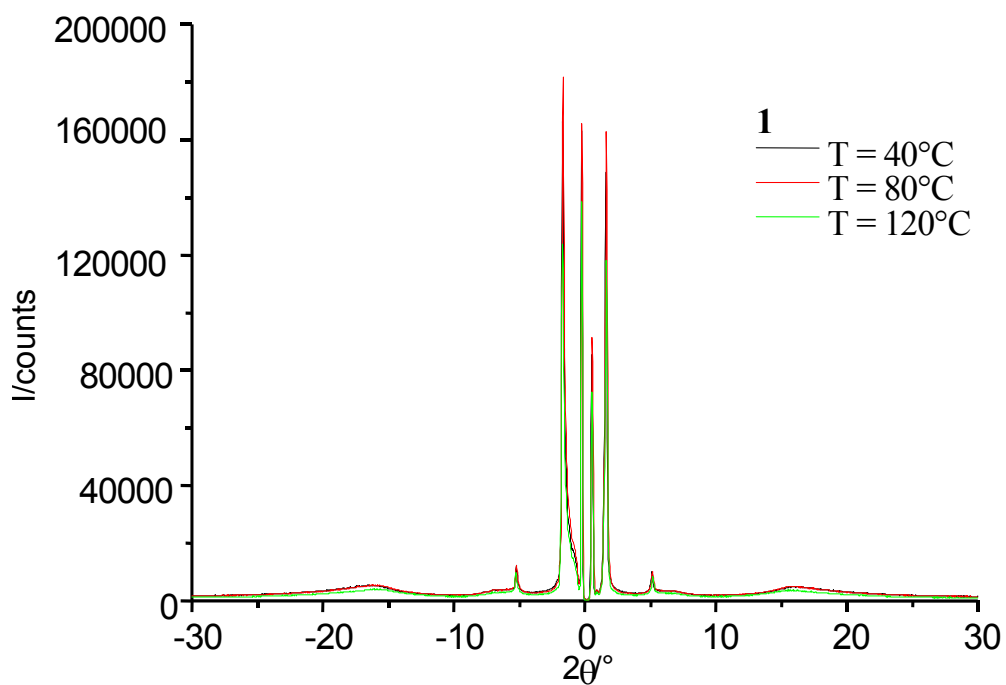

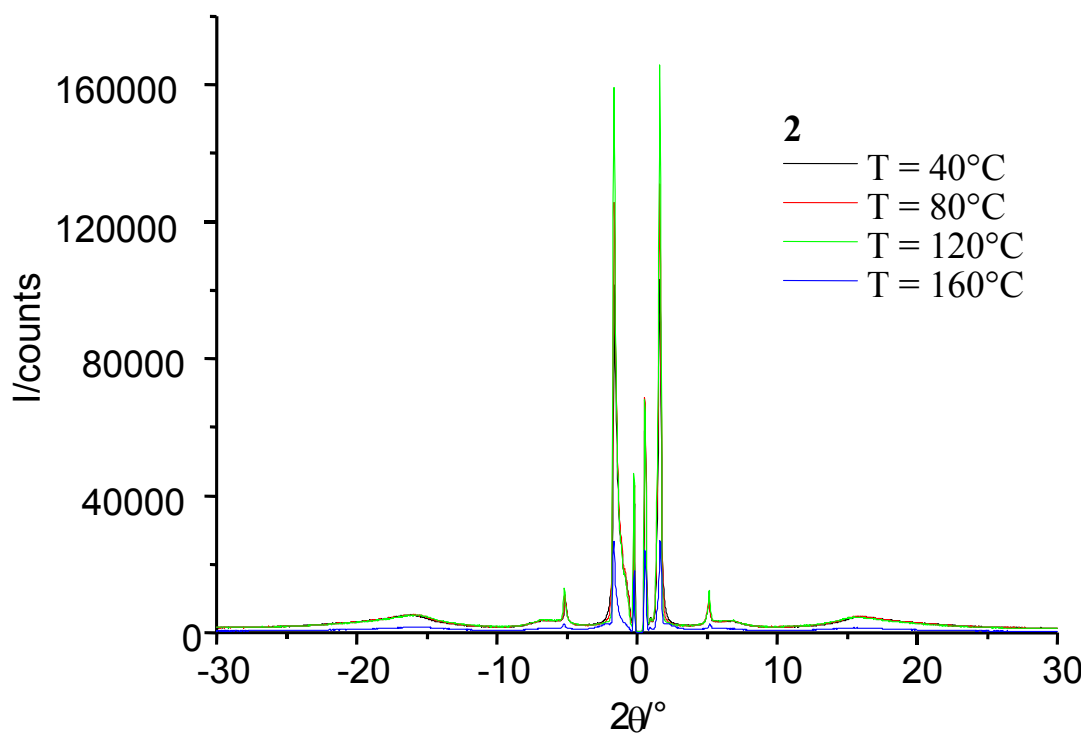

Variation of the lamellar periodicity  $d$  with temperature for 1 and 2.

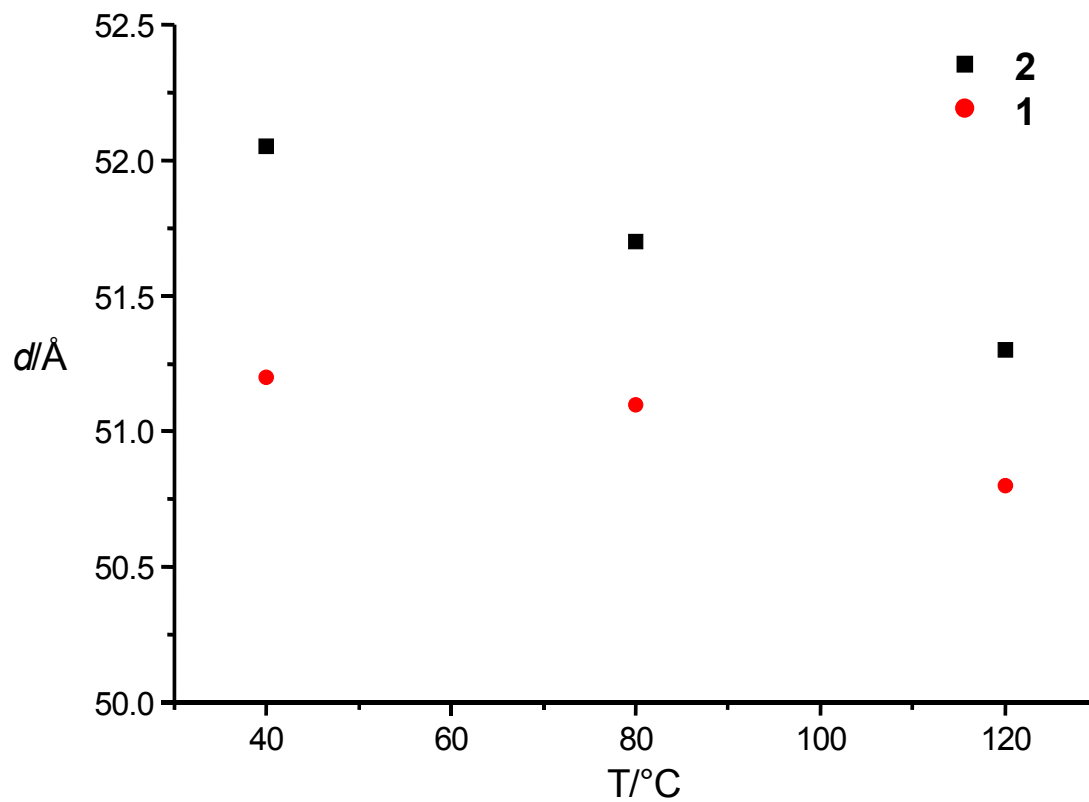



**Molecular modelling picture: short-range hexagonal lattice obtained for 1 by molecular modelling: (a) top view, (b) side view.**

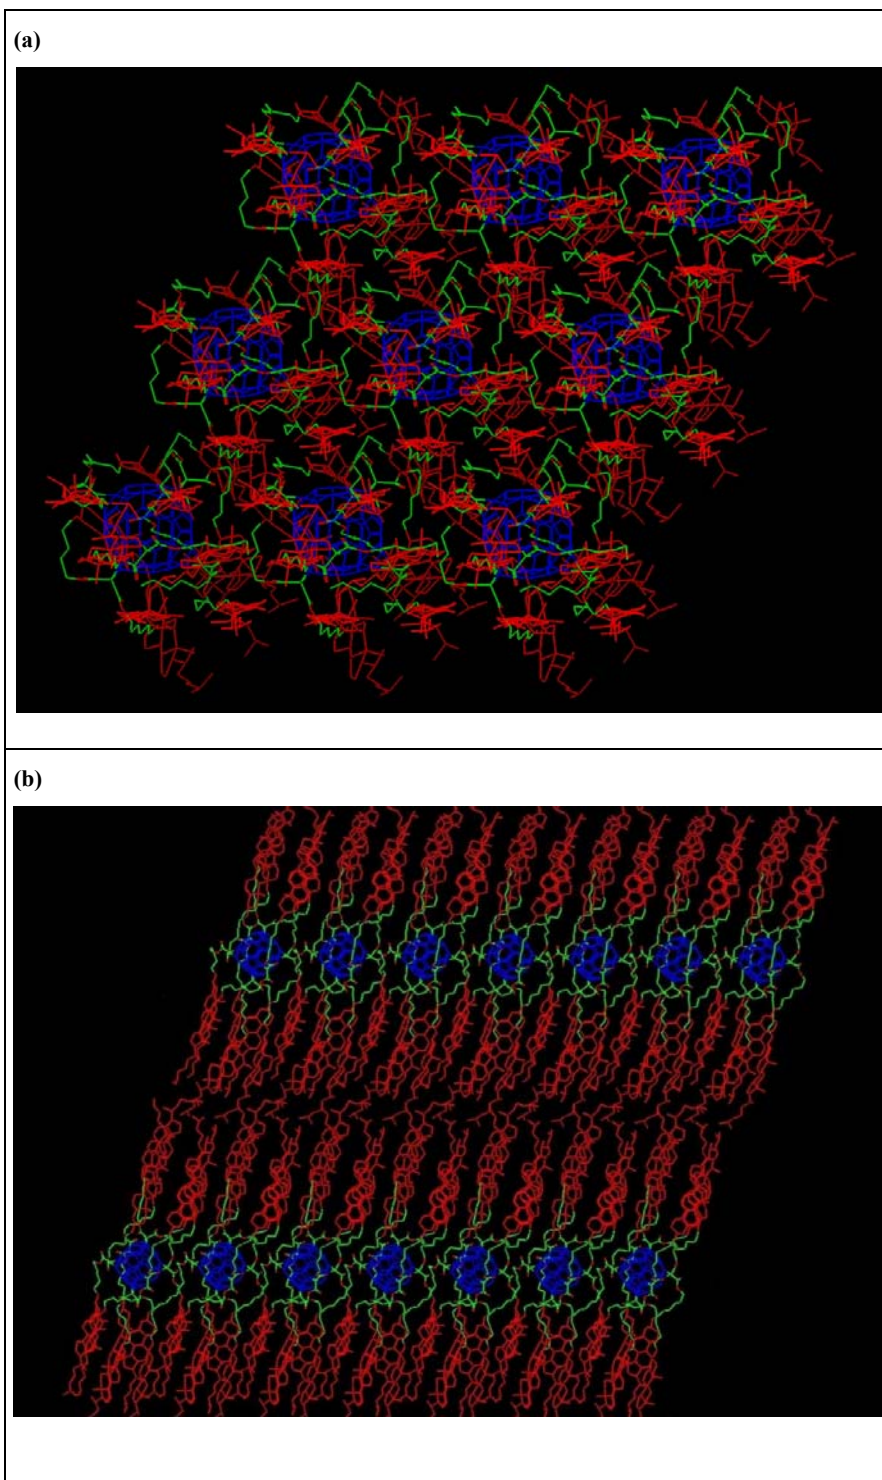

Supplement: b509081d.pdf [file b509081d.pdf]
